# Supplementary material
Source: Springer Nature journal article supplement (https://www.springermedizin.de/resource/supplementary/12936_2013_3152_MOESM9_ESM.pdf/9546286)
Supplement: MOESM9 [file 9546286]

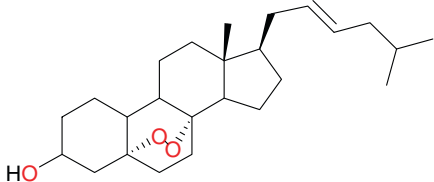

ergosterol-5,8-endoperoxide (**91**)

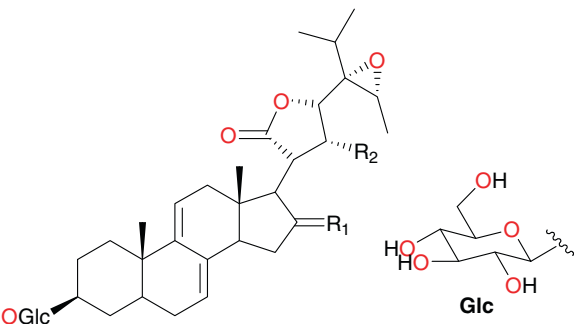

vernonioside A1  $R_1 = \beta\text{-OH}$ ,  $R_2 = \text{H}$  (**92**)

vernonioside A2  $R_1 = \alpha\text{-OH}$ ,  $R_2 = \text{H}$  (**93**)

vernonioside A3  $R_1 = \text{O}$ ,  $R_2 = \text{H}$  (**94**)

vernonioside B1  $R_1 = \text{H}$ ,  $R_2 = \text{OH}$  (**95**)

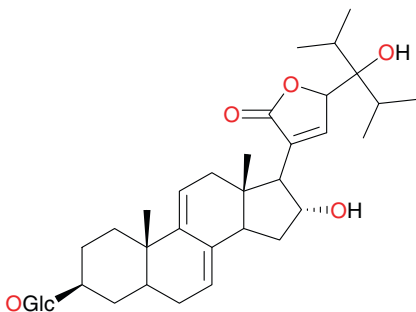

vernonioside A4 (**96**)
